# Supplementary material for: “Do I Need to Know This for the Exam?” Using Popular Media, Inquiry-based Laboratories, and a Community of Scientific Practice to Motivate Students to Learn Developmental Biology
Source: Atypon-hosted journal article supplement (doi:10.1187/cbe.07-06-0044), 2008-03-01
Supplement: supp1.pdf [file supp1.pdf]

Supplement 1. Lecture and Laboratory Schedule – Spring 2007.

| <b>BIOL 313 Developmental Biology Lecture Schedule*</b> |               |                                                                                                        |                                                              |                                                      |
|---------------------------------------------------------|---------------|--------------------------------------------------------------------------------------------------------|--------------------------------------------------------------|------------------------------------------------------|
|                                                         | <b>Dates</b>  | <b>Topic</b>                                                                                           | <b>Resources</b>                                             | <b>Activities/Other</b>                              |
| 1                                                       | 2/6<br>2/8    | Introduction<br>Life Cycles & Developmental Patterns                                                   | G 1 (p1-19)<br>G 2 (p25-30, 42-47)                           | Rules of Evidence I (p39-40)                         |
| 2                                                       | 2/13<br>2/15  | Fertilization & Cleavage<br>Early Development of Sea Urchins                                           | G 7; G 8 (p211-229)<br>S 1, S2, S4                           | OSF, HF readings assigned                            |
| 3                                                       | 2/20<br>2/22  | Early Development of Sea Urchins<br><b>Exam #1</b> (G1, 2, 7, 8)                                       | G 8 (p223-229)                                               |                                                      |
| 4                                                       | 2/27<br>3/1   | Principles of Experimental Embryology<br><b>The Great Debate</b>                                       | G 3 (p53-75)<br>G 4 (p77-87)                                 | Rules of Evidence II (pgs. 65-66)<br>In-class debate |
| 5                                                       | 3/6<br>3/8    | Cell-Cell Communication<br>Cell-Cell Communication                                                     | G 6<br>G 6                                                   |                                                      |
| 6                                                       | 3/13<br>3/15  | Early Development and Axis Formation in Amphibians (Frogs)                                             | G 10, G6 as needed; S 6                                      |                                                      |
| 7                                                       | 3/20<br>3/22  | Early Development and Axis Formation in Amphibians (Frogs)<br><b>Exam #2</b> (G3, 4, 6, 9, 10)         | G 10, G6 as needed; S 6                                      | survey                                               |
| 8                                                       | 3/27<br>3/29  | Drosophila Axis Development<br>Drosophila Axis Development                                             | G 9, G5 as needed                                            |                                                      |
| 9                                                       | 4/3<br>4/5    | <b>SPRING BREAK</b>                                                                                    |                                                              | OSF Ch. 1-5 (readings completed by this date)        |
| 10                                                      | 4/10<br>4/12  | <b>JC #1,2</b> (Environmental Toxicants)<br>Early Development of Vertebrates, Birds                    | (zebrafish, rats)<br>G 11(p336-348)                          | JC# 1,2                                              |
| 11                                                      | 4/17<br>4/19  | Early Development of Vertebrates, Birds and Mammals                                                    | G 11(p336-348), G 11 (p348-369)                              |                                                      |
| 12                                                      | 4/24<br>4/26  | <b>Exam #3</b> (G5, G9, G11, OSF)<br>Ectoderm & Neural Crest                                           | G 12 (p373-385), 13 (select)                                 |                                                      |
| 13                                                      | 5/1<br>5/3    | Ectoderm & Neural Crest<br>Somitogenesis & Intermediate Mesoderm                                       | G 12 (p373-385), 13 (select)<br>G 14 (p443-453 and p460-469) |                                                      |
| 14                                                      | 5/8<br>5/10   | Lateral Plate Mesoderm & Endoderm<br><b>JC #3, 4</b> (Environmental Toxicants)                         | G 15 (p471-482)<br>(human - lung, reproductive)              | JC# 3,4                                              |
| 15                                                      | 5/15<br>5/17  | Developmental Toxicology<br>Developmental Toxicology; focus gp                                         | G 21 (p 666-675), G 22 (p 712-719)                           | HF Ch. 3 and 6 (readings completed by this date)     |
| 16                                                      | 5/21-<br>5/25 | Final Exam Week – <b>Exam #4</b> (G11, 12, 13, 14, 15, 21, 22, HF, OSF) & optional comprehensive final |                                                              | OSF 12-14 (readings completed by this date)          |

\*Schedule is subject to change at instructor's discretion.

G – Gilbert's Developmental Biology, S - Schoenwolf

HF – Having Faith

OSF – Our Stolen Future

JC – journal club

| BIO 313 Developmental Biology Laboratory Schedule <sup>^</sup> |                                                                                                                                                                                               |                                         |                                                                     |
|----------------------------------------------------------------|-----------------------------------------------------------------------------------------------------------------------------------------------------------------------------------------------|-----------------------------------------|---------------------------------------------------------------------|
| Date                                                           | Topic                                                                                                                                                                                         | Organism(s)                             | Resources                                                           |
| 2/9#                                                           | Tool-making and Microscopy introduction ; focus group interview (distrib. survey); DYOE pretest                                                                                               |                                         | Vade Mecum (VM) ch.1-3                                              |
| 2/16                                                           | Sea Urchin Fertilization & Development <ul style="list-style-type: none"> <li>o fertilization and observation</li> </ul> <i>Lab Quiz</i>                                                      | Sea Urchin (demo & observation)         | sea urchin module handout VM ch. 6, 7; Sch. ch. 4; Gilbert ch. 8    |
| 2/23                                                           | Sea Urchin Fertilization & Development II <ul style="list-style-type: none"> <li>o design your own expt. (traditional or environmental)- proposal discussion*</li> </ul>                      | Sea urchin                              | sea urchin module handout VM ch. 6, 7; Sch. ch. 4; Gilbert ch. 8    |
| 3/2                                                            | Sea Urchin Fertilization & Development III <ul style="list-style-type: none"> <li>o Set-up expt.</li> <li>o Record results</li> </ul>                                                         | Sea urchin                              | sea urchin module handout VM ch. 6, 7: Sch. ch. 4; Gilbert ch. 8    |
| 3/9                                                            | Sea Urchin Fertilization & Development IV <ul style="list-style-type: none"> <li>o Set-up expt.</li> <li>o Record results</li> </ul>                                                          | Sea urchin                              | sea urchin module handout VM ch. 6, 7: Sch. ch. 4; Gilbert ch. 8    |
| 3/16                                                           | Drosophila Syncytial Development & Gene expression <ul style="list-style-type: none"> <li>o observation of stained embryos</li> </ul> <i>Lab Quiz; report on Sea urchin expts. due</i>        | Drosophila                              | fly module handouts; Sch ch. ; VM ch.8; Gilbert ch. 9               |
| 3/23                                                           | Drosophila Syncytial Development & Gene expression <ul style="list-style-type: none"> <li>o immunohistochemistry &amp; fluorescence microscopy</li> <li>o design your own staining</li> </ul> | Drosophila                              | fly module handouts; Sch ch. ; VM ch.8; Gilbert ch. 9               |
| 3/30                                                           | Drosophila Syncytial Development & Gene expression <ul style="list-style-type: none"> <li>o set-up staining</li> <li>o record results</li> </ul>                                              | Drosophila                              | fly module handouts; Sch ch. ; VM ch.8; Gilbert ch. 9               |
| 4/6                                                            | <b>SPRING BREAK</b>                                                                                                                                                                           |                                         |                                                                     |
| 4/13                                                           | Early/mid development, Vertebrates<br>Microscopic study of prepared chick embryos<br><i>Lab Quiz; report on Fly expts. due</i>                                                                | Chick embryos                           | chick module handout; Sch ch 7; G ch 11-15<br>VM 9, 10, 11          |
| 4/20                                                           | Early/mid development, Vertebrates <ul style="list-style-type: none"> <li>o Design your own experiment –proposal discussion*</li> </ul>                                                       | Chick                                   | chick module handout; VM ch.9,10, 11; Sch. ch. 7; Gilbert ch. 11-15 |
| 4/27                                                           | Early/mid development, Vertebrates <ul style="list-style-type: none"> <li>o Set-up expt</li> </ul>                                                                                            | Chick                                   | chick module handout; VM ch.9,10, 11; Sch. ch. 7; Gilbert ch. 11-15 |
| 5/4                                                            | Early/mid development, Vertebrates <ul style="list-style-type: none"> <li>o Record results</li> </ul> Finish any expts., lab notebook, reports                                                | Chick                                   | chick module handout; VM ch.9,10, 11; Sch. ch. 7; Gilbert ch. 11-15 |
| 5/11                                                           | Student poster session/presentations;<br>Turn in keys, equipment, etc.                                                                                                                        | student choice (sea urchin, fly, chick) |                                                                     |

<sup>^</sup> This schedule is subject to change without notice. We are dependent upon the availability, viability, and fertility of these animals. We cannot guarantee they will fulfill all three on the day we meet for lab.

# You and your lab partner will need to be in lab on days/times other than our regularly scheduled meeting times. I expect each of you to share the workload equitably.

\* If no changes are required, you may submit your proposal (one copy to Dr. Broussard and one copy to the lab manager) on Thursday. If changes are required, you must submit the revised proposal on Friday by 5pm.
